# Supplementary material for: Protective effect of Danggui (Radix Angelicae Sinensis) on angiotensin II-induced apoptosis in H9c2 cardiomyoblast cells
Source: PubMed Central journal article supplement (PMC4182826; doi:10.1186/1472-6882-14-358), 2014-09-25
Supplement: 12906_2014_1929_MOESM1_ESM.pdf [file 12906_2014_1929_MOESM1_ESM.pdf]

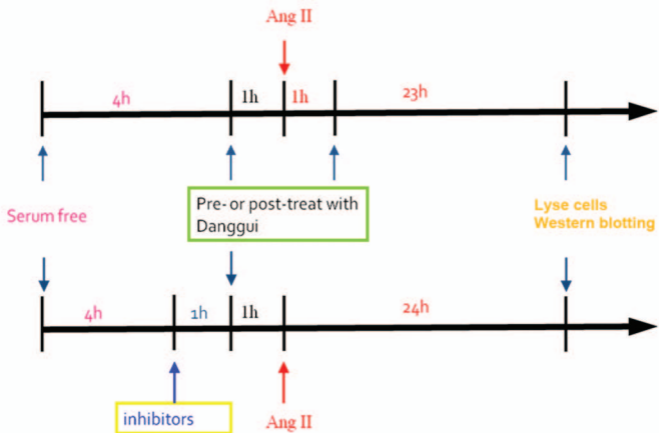

**Figure S1**

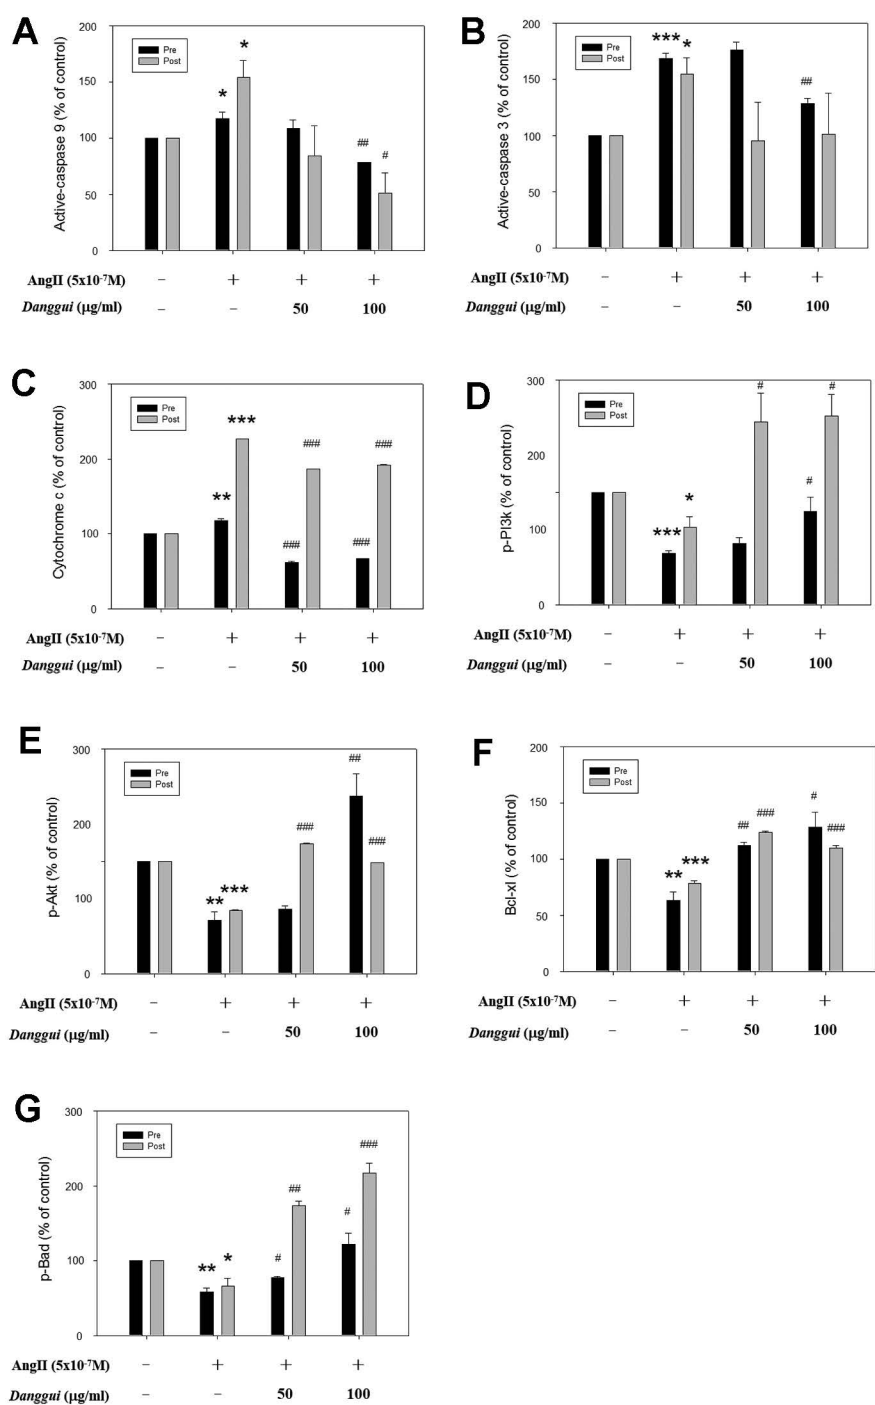

Figure S2

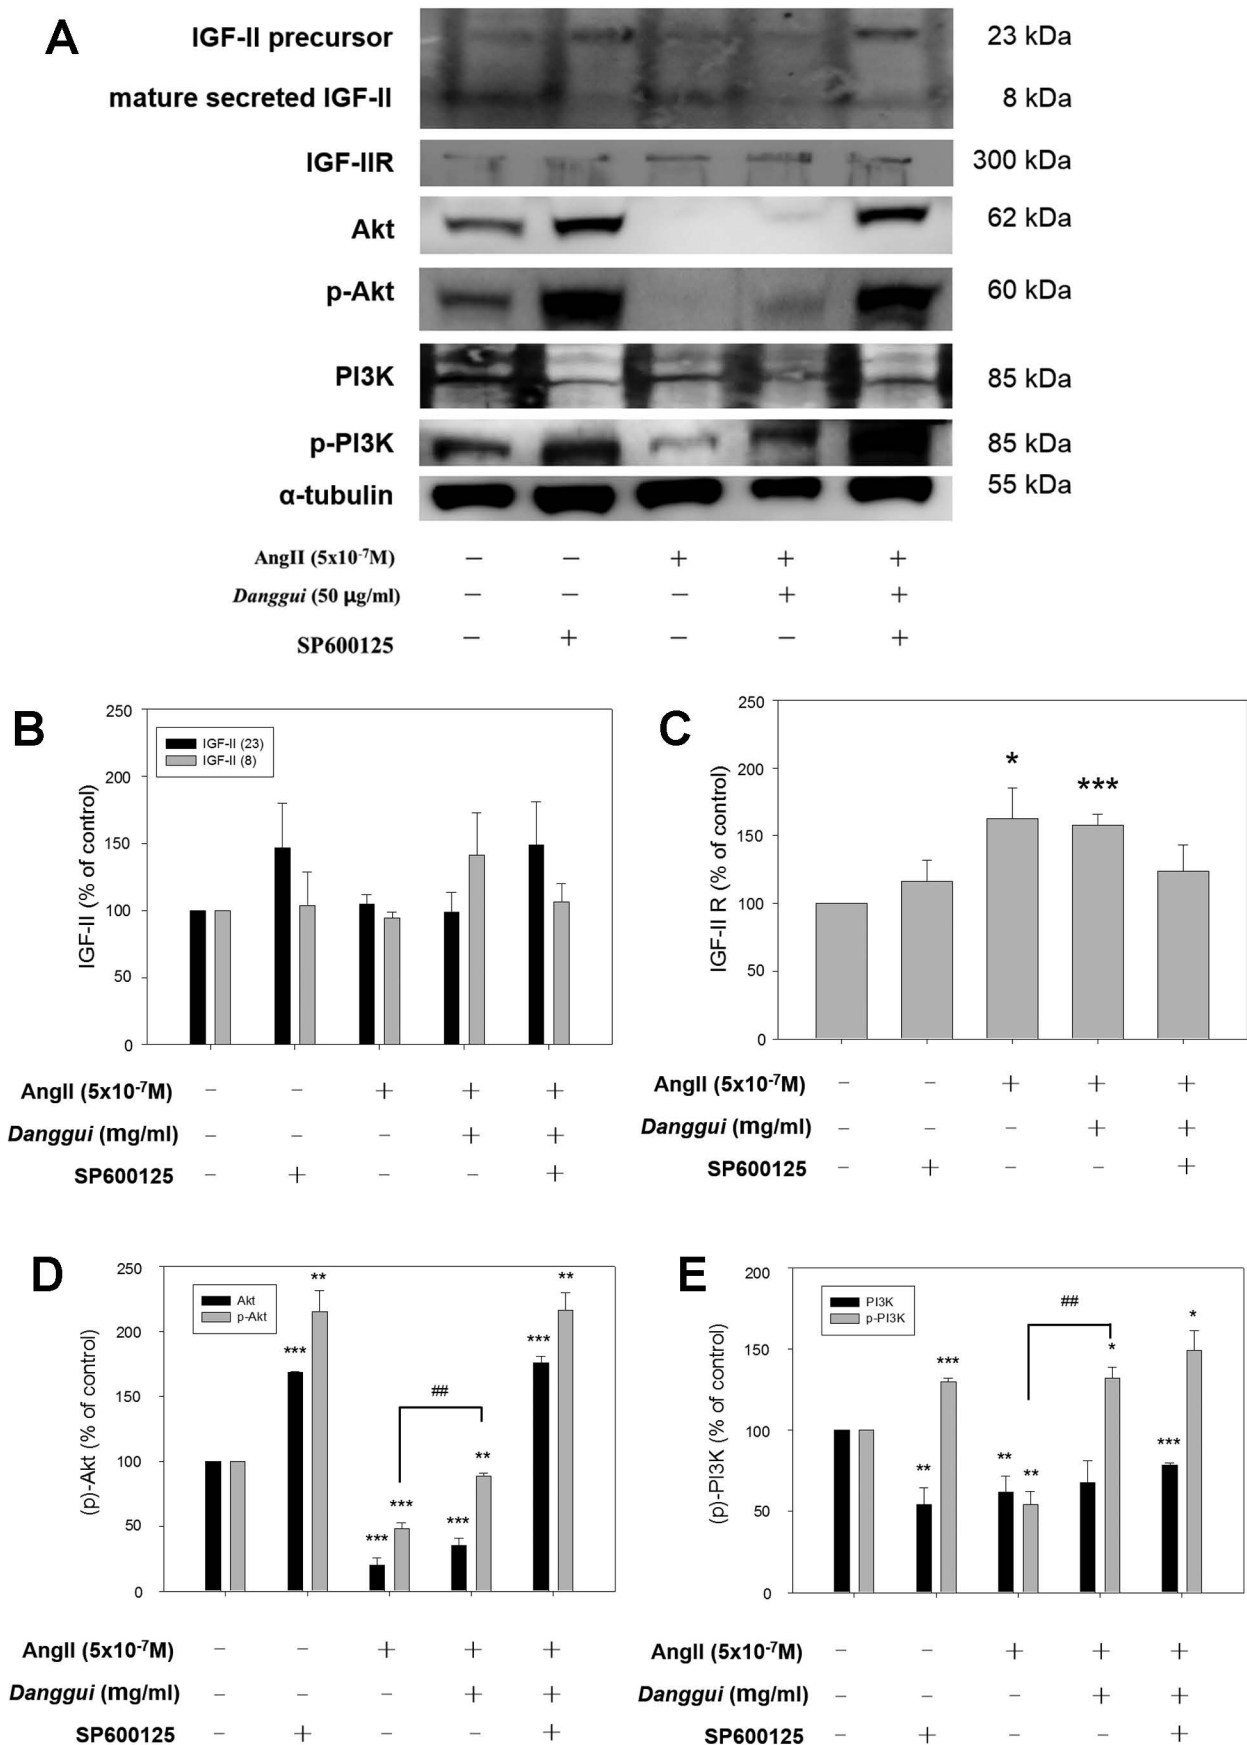

Figure S3

**A**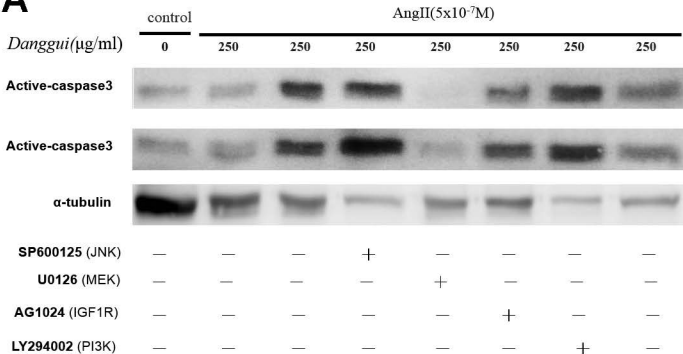**B**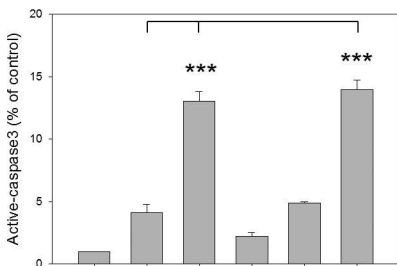

|                                        |   |   |   |   |   |   |
|----------------------------------------|---|---|---|---|---|---|
| <i>Danggui</i> (250 $\mu\text{g/ml}$ ) | - | + | + | + | + | + |
| AngII ( $5 \times 10^{-7} \text{M}$ )  | - | + | + | + | + | + |
| SP600125 (JNK)                         | - | - | + | - | - | - |
| U0126 (MEK)                            | - | - | - | + | - | - |
| AG1024 (IGF1R)                         | - | - | - | - | + | - |
| LY294002 (PI3K)                        | - | - | - | - | - | + |

**Figure S4**
